# Supplementary material
Source: PubMed Central journal article supplement (PMC1622855)
Supplement: pnas_0603403103_1.pdf [file pnas_0603403103_1.pdf]

**Table 2. Ste11p target genes expressed in both cell types**

| Common name                                    | Systematic name     | Sexual diff. function | Known Ste11p target                                 | Description                                                            |
|------------------------------------------------|---------------------|-----------------------|-----------------------------------------------------|------------------------------------------------------------------------|
| <b>Regulation of meiosis</b>                   |                     |                       |                                                     |                                                                        |
| <i>mei2</i>                                    | <i>SPAC27D7.03c</i> | Meiotic defect        | Yes                                                 | RNA-binding protein that regulates meiosis progression                 |
| <i>sme2</i>                                    | <i>SPNCRNA.103</i>  | Meiotic defect        | Yes                                                 | Noncoding RNA that binds to <i>mei2</i>                                |
| <i>ran1;pat1</i>                               | <i>SPBC19C2.05</i>  | Meiotic defect        | Not studied                                         | Protein kinase that negatively regulates meiosis                       |
| <b>Regulation of mating/pheromone response</b> |                     |                       |                                                     |                                                                        |
| <i>spk1</i>                                    | <i>SPAC31G5.09c</i> | Abnormal mating       | Predicted                                           | MAP kinase of the pheromone pathway                                    |
| <i>pmp1;dsp1</i>                               | <i>SPBC1685.01</i>  | Not studied           | Not studied                                         | Protein phosphatase, may dephosphorylate <i>spk1</i>                   |
| <i>pyp2</i>                                    | <i>SPAC19D5.01</i>  | Not studied           | Not studied                                         | Protein phosphatase, may dephosphorylate <i>spk1</i>                   |
| <i>gap1;src1;sar1</i>                          | <i>SPBC646.12c</i>  | Abnormal mating       | Reported not regulated by starvation or pheromone   | GTPase-activating protein, negative regulator of mating                |
| <i>rgs1</i>                                    | <i>SPAC22F3.12c</i> | Abnormal mating       | Yes                                                 | Regulator of G protein signalling (RGS) family member                  |
| <i>ste6</i>                                    | <i>SPCC1442.01</i>  | Abnormal mating       | Yes                                                 | Guanyl-nucleotide exchange factor, regulates conjugation               |
| <i>ste7</i>                                    | <i>SPAC23E2.03c</i> | Abnormal mating       | Yes                                                 | Regulator of mating                                                    |
| <i>gpa1</i>                                    | <i>SPBC24C6.06</i>  | Abnormal mating       | Induced by starvation, Ste11p-dependency not tested | G-alpha family                                                         |
| <i>ste11;steX;aff1</i>                         | <i>SPBC32C12.02</i> | Abnormal mating       | Yes                                                 | Transcription factor, contains an HMG box                              |
| <i>map1</i>                                    | <i>SPAC11E3.06</i>  | Abnormal mating       | Yes                                                 | MADS box transcription factor, regulates of mating-type specific genes |
| <i>ste4</i>                                    | <i>SPAC1565.04c</i> | Abnormal mating       | Yes                                                 | Contains SAM and RAS association domains, regulates mating             |
| <b>Nuclear movement</b>                        |                     |                       |                                                     |                                                                        |
| <i>dhc1</i>                                    | <i>SPAC1093.06c</i> | Meiotic defect        | Induced by starvation, Ste11p-dependency not tested | Cytoplasmic dynein heavy chain, required for nuclear movement          |
| <b>Cell fusion</b>                             |                     |                       |                                                     |                                                                        |
| <i>fus1</i>                                    | <i>SPAC20G4.02c</i> | Abnormal cell fusion  | Yes                                                 | Required for cell fusion                                               |
|                                                | <i>SPAP7G5.03</i>   | Not studied           | Not studied                                         | Similar to <i>Sa. cerevisiae</i> Prm1p, which is required for mating   |
|                                                | <i>SPAC31G5.07</i>  | Not studied           | Not studied                                         | Similar to <i>Sa. cerevisiae</i> Fig1p, which is required for mating   |
| <b>Nuclear fusion</b>                          |                     |                       |                                                     |                                                                        |
| <i>tht1</i>                                    | <i>SPAC13C5.03</i>  |                       | Not studied                                         | Required for nuclear fusion after mating                               |

| <b>Cell cycle regulators</b> |                      |                 |                                   |                                                                           |
|------------------------------|----------------------|-----------------|-----------------------------------|---------------------------------------------------------------------------|
| <i>cig2;cyc17</i>            | <i>SPAPB2B4.03</i>   | No              | Not studied                       | G <sub>1</sub> /S-phase cyclin                                            |
| <i>rum1</i>                  | <i>SPBC32F12.09</i>  | Abnormal mating | Not studied                       | cdk inhibitor                                                             |
| <i>cdc10</i>                 | <i>SPBC336.12c</i>   | No              | Not studied                       | Subunit of the MBF transcription factor complex, required for S phase     |
| <i>apc2</i>                  | <i>SPBP23A10.04</i>  | Not studied     | Not studied                       | Component of the Anaphase Promoting Complex (APC)                         |
| <b>Others</b>                |                      |                 |                                   |                                                                           |
| <i>ubp11</i>                 | <i>SPBC19C2.04c</i>  | Not studied     | Not studied                       | Ubiquitin C-terminal hydrolase activity                                   |
| <i>shk2;pak2</i>             | <i>SPAC1F5.09c</i>   | Normal mating   | Not studied                       | PAK-related serine/threonine protein kinase                               |
|                              | <i>SPCC162.10</i>    | Not studied     | Not studied                       | Serine/threonine protein kinase                                           |
| <i>ehs1;yam8</i>             | <i>SPAC1F5.08c</i>   | Abnormal mating | Not studied                       | Predicted glycoprotein, required for cell wall integrity                  |
| <i>itr2</i>                  | <i>SPAC20G8.03</i>   | Abnormal mating | No, induced by glucose starvation | Myo-inositol transporter, essential gene                                  |
|                              | <i>SPBP4H10.11c</i>  | Not studied     | Not studied                       | Long-chain-fatty-acid-CoA ligase activity (predicted)                     |
| <i>cpp1</i>                  | <i>SPAC17G6.04c</i>  | Abnormal mating | Not studied                       | Beta subunit of farnesyltransferase (FTase)                               |
| <i>rlc1</i>                  | <i>SPAC926.03</i>    | Not studied     | Not studied                       | Myosin II regulatory light chain, involved in cytokinesis                 |
| <i>rad54;rhp54</i>           | <i>SPAC15A10.03c</i> | Not studied     | Not studied                       | DEAD/DEAH box helicase involved in DNA repair                             |
|                              | <i>SPBC3F6.01c</i>   | Not studied     | Not studied                       | Serine/threonine protein phosphatase                                      |
| <i>rep1;rec16</i>            | <i>SPBC2D10.06</i>   | Normal mating   | Yes                               | Transcription factor regulator of pre-meiotic DNA synthesis               |
|                              | <i>SPBC3D6.13c</i>   | Not studied     | Not studied                       | Member of the protein disulfide isomerase oxidoreductase family           |
|                              | <i>SPAC4G9.14</i>    | Not studied     | Not studied                       | Member of the Mpv17/PMP22 family of peroxisomal membrane proteins         |
| <i>etr1</i>                  | <i>SPAC26F1.04c</i>  | Not studied     | Not studied                       | Enoyl-[acyl-carrier protein] reductase (predicted)                        |
| <i>mcp5</i>                  | <i>SPBC216.02</i>    | Not studied     | Not studied                       | Similarity to nuclear migration protein 1 ( <i>Sa. cerevisiae</i> Num1p), |
|                              | <i>SPAC7D4.09c</i>   | Not studied     | Not studied                       | Member of the 3-oxo-5-alpha-steroid 4-dehydrogenase family                |
|                              | <i>SPBC13G1.02</i>   | Not studied     | Not studied                       | Mannose-1-phosphate guanyltransferase (predicted)                         |
| <i>rad17</i>                 | <i>SPAC14C4.13</i>   | Not studied     | Not studied                       | Involved in DNA repair and replication checkpoint control                 |
|                              | <i>SPBC4.01</i>      | Not studied     | Not studied                       | Sequence orphan, unknown function                                         |
|                              | <i>SPBC146.02</i>    | Not studied     | Not studied                       | Sequence orphan, unknown function                                         |
|                              | <i>SPCC338.18</i>    | Not studied     | Not studied                       | Sequence orphan, unknown function                                         |
|                              | <i>SPAC29B12.11c</i> | Not studied     | Not studied                       | Orthologue of human WW domain binding protein-2, unknown function         |
|                              | <i>SPAC18G6.01c</i>  | Not studied     | Not studied                       | Conserved hypothetical protein, unknown function                          |
|                              | <i>SPAC8C9.16c</i>   | Not studied     | Not studied                       | Unknown function, contains TLD domain                                     |
|                              | <i>SPAP27G11.14c</i> | Not studied     | Not studied                       | Sequence orphan, unknown function                                         |
|                              | <i>SPBC1604.01</i>   | Not studied     | Not studied                       | Contains a domain of unknown function (DUF323)                            |
|                              | <i>SPBC359.06</i>    | Not studied     | Not studied                       | Contains a Class II aldolase domain and adducin N terminal domain         |
|                              | <i>SPBC902.06</i>    | Not studied     | Not studied                       | Sequence orphan, predicted coiled-coil, localised to spindle pole body    |

|             |                      |                      |             |                                                                        |
|-------------|----------------------|----------------------|-------------|------------------------------------------------------------------------|
|             | <i>SPCC1393.07c</i>  | Not studied          | Not studied | Sequence orphan, unknown function                                      |
| <i>eta2</i> | <i>SPAC31G5.10</i>   | Not studied          | Not studied | Contains two Myb DNA-binding domains                                   |
|             | <i>SPAC22A12.06c</i> | Not studied          | Not studied | Contains a domain of unknown function (DUF341)                         |
|             | <i>SPAC2C4.17c</i>   | Not studied          | Not studied | Possible ion channel                                                   |
|             | <i>SPAC32A11.01</i>  | Not studied          | Not studied | Conserved hypothetical protein, unknown function                       |
| <i>pvg2</i> | <i>SPAC27E2.07</i>   | Normal mating        | Not studied | Involved in cell wall biosynthesis                                     |
|             | <i>SPBC19G7.14c</i>  | Not studied          | Not studied | Sequence orphan, unknown function                                      |
| <i>elg1</i> | <i>SPBC947.11c</i>   | Not studied          | Not studied | Replication factor C complex                                           |
| <i>omt2</i> | <i>SPAC27D7.04</i>   | Abnormal sporulation | Not studied | Required for spore wall formation                                      |
|             | <i>SPBC354.08c</i>   | Not studied          | Not studied | Contains a domain of unknown function (DUF221)                         |
|             | <i>SPAC227.06</i>    | Not studied          | Not studied | Member of the YIP1 family, predicted to be involved in vesicle traffic |

Ste11p targets were identified as described in the text. Column three indicates whether the genes are known to have a function in sexual differentiation and column four indicates whether their Ste11p-dependency has been studied. Mutant phenotypes and descriptions were compiled by using information from GeneDB ([www.genedb.org](http://www.genedb.org)), PombePD ([www.proteome.com](http://www.proteome.com)), and our own literature searches.
