# Supplementary material
Source: PubMed Central journal article supplement (PMC1622855)
Supplement: pnas_0603403103_2.pdf [file pnas_0603403103_2.pdf]

**Table 3. Mating type-specific genes from fission yeast**

| Common name       | Systematic name      | Mutant phenotype                                                   | Known mating-type specific | Description                                                                                  |
|-------------------|----------------------|--------------------------------------------------------------------|----------------------------|----------------------------------------------------------------------------------------------|
| <b>M specific</b> |                      |                                                                    |                            |                                                                                              |
| <i>mfm1</i>       | <i>SPAPB8E5.05</i>   | M specific sterility<br>Redundant with <i>mfm2</i> and <i>mfm3</i> | Yes                        | M factor pheromone precursor                                                                 |
| <i>mfm2</i>       | <i>SPAC513.03</i>    | M specific sterility<br>Redundant with <i>mfm1</i> and <i>mfm3</i> | Yes                        | M factor pheromone precursor                                                                 |
| <i>mfm3</i>       | <i>SPBPJ4664.03</i>  | M specific sterility<br>Redundant with <i>mfm1</i> and <i>mfm2</i> | Yes                        | M factor pheromone precursor                                                                 |
| <i>mam1</i>       | <i>SPBC25B2.02c</i>  | M specific sterility                                               | Yes                        | ABC transporter, probably transports M factor                                                |
| <i>mam2</i>       | <i>SPAC11H11.04</i>  | M specific sterility                                               | Yes                        | P factor pheromone receptor                                                                  |
| <i>sxa2</i>       | <i>SPAC1296.03c</i>  | M specific sterility                                               | Yes                        | Secreted protease, down-regulates P factor                                                   |
| <i>mam4</i>       | <i>SPAC10F6.12c</i>  | M specific sterility                                               | Reported not M specific    | Farnesyl cysteine carboxyl methyltransferase, required for the M factor pheromone processing |
| <i>cwp1</i>       | <i>SPAPB1A10.04c</i> | Essential (this work)                                              | No                         | Geranylgeranyltransferase (alpha subunit)                                                    |
|                   | <i>SPAPB1A10.02</i>  | Essential (this work)                                              | No                         | Sequence orphan                                                                              |
| <i>mam3</i>       | <i>SPAP11E10.02c</i> | M specific sterility (this work)                                   | No                         | Predicted glycoprotein, similar to <i>SPBC21D10.06c</i> (P specific)                         |
|                   | <i>SPAC11H11.03c</i> | Normal mating                                                      | No                         | Contains SMR (Small MutS-Related) domain                                                     |
|                   | <i>SPAC11H11.05c</i> | Normal mating                                                      | No                         | Sequence orphan                                                                              |
| <b>P specific</b> |                      |                                                                    |                            |                                                                                              |
| <i>map2</i>       | <i>SPCC1795.06</i>   | P specific sterility                                               | Yes                        | P factor pheromone precursor                                                                 |
| <i>map3</i>       | <i>SPAC3F10.10c</i>  | P specific sterility                                               | Yes                        | M factor pheromone receptor                                                                  |
| <i>map4</i>       | <i>SPBC21D10.06c</i> | P specific sterility (this work)                                   | No                         | Predicted glycoprotein, similar to <i>SPAP11E10.02c</i> (M specific)                         |
|                   | <i>SPAC1565.03</i>   | Normal mating                                                      | No                         | Sequence orphan                                                                              |

Mating type-specific genes were identified as described in the text. Genes shown in orange were not previously known to be specifically induced in a mating type-specific fashion. Mutant phenotypes and descriptions were compiled by using information from GeneDB ([www.genedb.org](http://www.genedb.org)), PombePD ([www.proteome.com](http://www.proteome.com)), and our own literature searches. Column four indicates whether mating type-specific expression previously had been studied. *SPAP11E10.02c* and *SPBC21D10.06c* have been independently identified and named *mam3* and *map4*, respectively (M. Yamamoto, personal communication).
